# Supplementary material
Source: PubMed Central journal article supplement (PMC3496792)
Supplement: NIHMS414345-supplement-Suppl_data.pdf [file NIHMS414345-supplement-Suppl_data.pdf]

## Supplemental Information

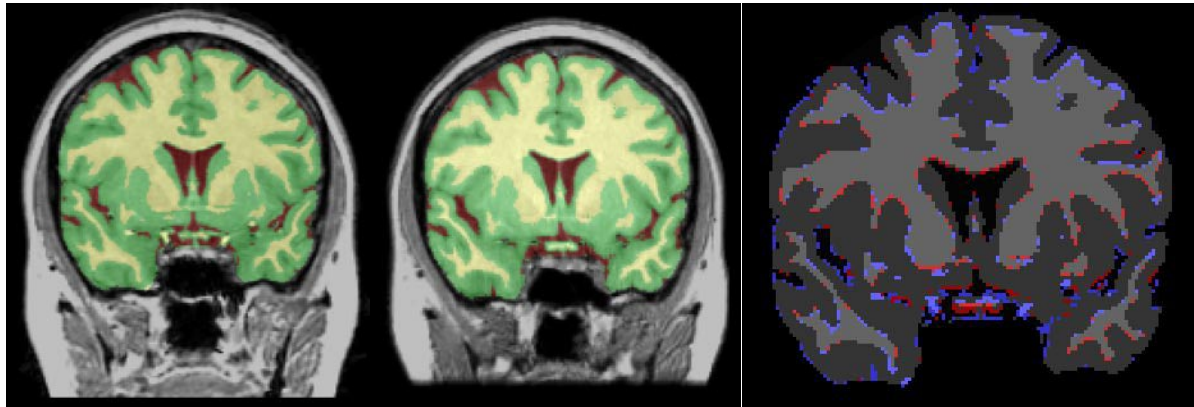

**Figure S1.** Visual Comparison of MR5 and MR6 Scans with a Difference Image. MR5 (left) and MR6 (center) images are the discrete classified image (yellow = WM, green = GM, red = CSF) overlaid at 25% translucence on their respective T1 images (bias-field corrected, ACPC aligned). Difference image (right): Red regions are positive differences, blue are negative values. This shows a slight superior offset (~1 voxel) of the MR5 relative to the MR6. CSF, cerebrospinal fluid; GM, gray matter; WM, white matter.

### Description of scan sequences

For MR5 the T1-weighted scan was acquired using a 3D spoiled recalled gradient echo sequence with the following scan parameters: TE = 5 ms, TR = 24 ms, flip angle = 40°, number of excitations (NEX) = 2, field of view (FOV) = 26 × 19 × 18.6 cm, matrix = 256 × 192 × 124. The PD- and T2-weighted scans were acquired using a fast spin-echo sequence with the following parameters: TE = 28/96 ms for the PD and T2, respectively, TR = 3000 ms, slice thickness/gap = 3.0 mm/0.0 mm, NEX = 1, FOV = 26 cm, matrix = 256 × 192, echo train length (ETL) = 8. For MR6 the T1-weighted scan was acquired with the following parameters: a coronal FLASH sequence with TE = 6 ms, TR = 20 ms, flip angle = 30°, FOV = 260 × 260 × 192 mm, matrix = 256 × 256 × 144, NEX = 2, slice thickness .65 mm, ETL = 5. The T2 images were acquired using a 2D fast spin-echo sequence in the coronal plane with the following parameters: TE = 85

ms, TR = 4800 ms, slice thickness/gap = 1.8/0.0 mm, FOV = 160 × 160 mm, matrix = 256 × 256, NEX = 3, number of echoes = 8, number of slices = 124.

**Table S1.** Demographic data by scan type and gender

|                     | <b>Clinical and Demographic Characteristics</b>    | <b>N</b> | <b>Mean</b> | <b>SD</b>  |
|---------------------|----------------------------------------------------|----------|-------------|------------|
| <b>All Patients</b> | Age at Onset (years)                               | 202      | 21.97326    | 5.831076   |
|                     | Duration of Symptoms Prior to Onset (weeks)        | 202      | 60.61194    | 81.4690043 |
|                     | Negative Symptom Severity at Intake (max = 20)     | 202      | 11.51244    | 3.653915   |
|                     | Positive Symptom Severity at Intake (max = 10)     | 202      | 6.174129    | 2.7430872  |
|                     | Disorganized Symptom Severity at Intake (max = 15) | 202      | 4.890547    | 2.9896422  |
|                     | Parental Education                                 | 196      | 13.38462    | 2.8526113  |
|                     | Parental Social Class                              | 202      | 2.945274    | 0.7361997  |
| <b>By MR Type</b>   |                                                    |          |             |            |
| <b>MR5 scans</b>    | Age at Onset                                       | 162      | 22.08871    | 5.5922377  |
|                     | Duration of Symptoms Prior to Onset (weeks)        | 162      | 54.35802    | 67.1905252 |
|                     | Negative Symptom Severity at Intake (max = 20)     | 162      | 11.58025    | 3.6927466  |
|                     | Positive Symptom Severity at Intake (max = 10)     | 162      | 6.074074    | 2.8186503  |
|                     | Disorganized Symptom Severity at Intake (max = 15) | 162      | 5.049383    | 3.0150811  |
|                     | Parental Education                                 | 156      | 13.26923    | 2.8496659  |
|                     | Parental Social Class                              | 162      | 2.975309    | 0.7218904  |
| <b>MR6 scans</b>    | Age at Onset                                       | 40       | 21.49371    | 6.7943255  |
|                     | Duration of Symptoms Prior to Onset (weeks)        | 40       | 86.58974    | 122.252913 |
|                     | Negative Symptom Severity at Intake (max = 20)     | 40       | 11.23077    | 3.5203285  |
|                     | Positive Symptom Severity at Intake (max = 10)     | 40       | 6.589744    | 2.3920697  |
|                     | Disorganized Symptom Severity at Intake (max = 15) | 40       | 4.230769    | 2.8234128  |

|                        |                                                    |     |          |            |
|------------------------|----------------------------------------------------|-----|----------|------------|
|                        | Parental Education                                 | 40  | 13.84615 | 2.8542532  |
|                        | Parental Social Class                              | 40  | 2.820513 | 0.7904627  |
| <b>By Gender</b>       |                                                    |     |          |            |
| <b>Male patients</b>   | Age at Onset                                       | 148 | 21.45164 | 5.203414   |
|                        | Duration of Symptoms Prior to Onset (weeks)        | 148 | 63.2585  | 86.692504  |
|                        | Negative Symptom Severity at Intake (max = 20)     | 148 | 11.87755 | 3.6431545  |
|                        | Positive Symptom Severity at Intake (max = 10)     | 148 | 6.081633 | 2.8681296  |
|                        | Disorganized Symptom Severity at Intake (max = 15) | 148 | 4.761905 | 2.8316541  |
|                        | Parental Education                                 | 141 | 13.50709 | 2.8728941  |
|                        | Parental Social Class                              | 148 | 2.931973 | 0.7277274  |
| <b>Female patients</b> | Age at Onset                                       | 54  | 23.39322 | 7.1353315  |
|                        | Duration of Symptoms Prior to Onset (weeks)        | 54  | 53.40741 | 65.3482741 |
|                        | Negative Symptom Severity at Intake (max = 20)     | 54  | 10.51852 | 3.5274703  |
|                        | Positive Symptom Severity at Intake (max = 10)     | 54  | 6.425926 | 2.3759951  |
|                        | Disorganized Symptom Severity at Intake (max = 15) | 54  | 5.240741 | 3.3866285  |
|                        | Parental Education                                 | 54  | 13.06481 | 2.8000106  |
|                        | Parental Social Class                              | 54  | 2.981482 | 0.7645628  |

**Table S2.** Comparison of occipital lobe brain volume changes between schizophrenia patients and healthy volunteers

| Regions of Interest | B-coefficient (SE) (cc/yr) |                    | Age<br>F1,621 (p) | Age x Group<br>Interaction<br>F1,621 (p) |
|---------------------|----------------------------|--------------------|-------------------|------------------------------------------|
|                     | Patients (N = 202)         | Controls (N = 125) |                   |                                          |
| Occipital GM        | -0.08 (0.04)               | -0.09 (0.03)       | 0.0 (.97)         | 7.7 (.006)                               |
| Occipital WM        | -0.08 (0.05)               | 0.07 (0.04)        | 6.7 (.01)         | 11.1 (.0009)                             |
| Occipital CSF       | -0.02 (0.02)               | 0.03 (0.01)        | 62.4 (<.0001)     | 12.7 (.0004)                             |

CSF, cerebrospinal fluid; GM, gray matter; WM, white matter.

**Table S3.** Comparison of occipital lobe brain volume changes with each successive interscan interval<sup>a</sup> between healthy volunteers and schizophrenia patients

|               | 1 <sup>st</sup> interscan interval |                       | T ( $\rho$ ) | 2 <sup>nd</sup> interscan interval |                       | T ( $\rho$ ) | 3 <sup>rd</sup> interscan interval |                      | T ( $\rho$ ) |
|---------------|------------------------------------|-----------------------|--------------|------------------------------------|-----------------------|--------------|------------------------------------|----------------------|--------------|
|               | Controls<br>(N = 125)              | Patients<br>(N = 202) |              | Controls<br>(N = 42)               | Patients<br>(N = 126) |              | Controls<br>(N = 15)               | Patients<br>(N = 79) |              |
| Occipital GM  | 0.62 (2.61)                        | 0.86 (3.07)           | 0.75 (.46)   | -0.10 (1.55)                       | 0.08 (1.52)           | 0.66 (.51)   | -0.06 (1.09)                       | -0.36 (1.34)         | 0.82 (.42)   |
| Occipital WM  | -0.34 (2.86)                       | -0.97 (4.06)          | 1.50 (.13)   | 0.45 (2.25)                        | 0.61 (2.37)           | 0.38 (.71)   | 0.89 (1.73)                        | -0.14 (2.18)         | 1.72 (.09)   |
| Occipital CSF | 25.9 (75.26)                       | 10.4 (43.60)          | 2.35 (.02)   | 3.55 (13.0)                        | 5.22 (14.91)          | 0.65 (.52)   | 5.52 (11.90)                       | 12.4 (24.26)         | 1.08 (.29)   |

CSF, cerebrospinal fluid; GM, gray matter; WM, white matter.

<sup>a</sup> Mean percent of prior scan per year (SD); 1<sup>st</sup> interscan interval: (Time 2 scan volume minus Time 1 scan volume) divided by Time 1 scan volume per year (df = 325); 2<sup>nd</sup> interscan interval: (Time 3 scan volume minus Time 2 scan volume) divided by Time 2 scan volume per year (df = 166); 3<sup>rd</sup> interscan interval: (Time 4 scan volume minus Time 3 scan volume) divided by Time 3 scan volume per year (df = 92).

**Table S4.** Correlations between occipital lobe brain volume change and cognitive measures

|               | <u>Verbal Learning</u> |          | <u>Attention</u> |          | <u>Problem Solving</u> |          | <u>Verbal Fluency</u> |          | <u>Working Memory</u> |          | <u>Motor Speed</u> |          |
|---------------|------------------------|----------|------------------|----------|------------------------|----------|-----------------------|----------|-----------------------|----------|--------------------|----------|
|               | <i>r</i>               | <i>p</i> | <i>r</i>         | <i>p</i> | <i>r</i>               | <i>p</i> | <i>r</i>              | <i>p</i> | <i>r</i>              | <i>p</i> | <i>r</i>           | <i>p</i> |
| Occipital GM  | -0.13                  | .07      | -0.12            | .10      | -0.02                  | .73      | 0.02                  | .81      | -0.04                 | .60      | -0.02              | .80      |
| Occipital WM  | 0.15                   | .04      | 0.13             | .06      | 0.03                   | .64      | -0.04                 | .60      | 0.08                  | .28      | -0.03              | .68      |
| Occipital CSF | -0.16                  | .03      | -0.13            | .07      | -0.13                  | .07      | -0.08                 | .27      | -0.20                 | .007     | -0.01              | .91      |

CSF, cerebrospinal fluid; GM, gray matter; WM, white matter.

**Table S5.** Correlations between occipital lobe brain volume change and symptom dimensions

|               | <u>Negative</u> |          | <u>Psychotic</u> |          | <u>Disorganized</u> |          |
|---------------|-----------------|----------|------------------|----------|---------------------|----------|
|               | <i>r</i>        | <i>p</i> | <i>r</i>         | <i>p</i> | <i>r</i>            | <i>p</i> |
| Occipital GM  | 0.10            | .15      | -0.03            | .62      | 0.01                | .91      |
| Occipital WM  | -0.05           | .46      | 0.04             | .58      | -0.06               | .42      |
| Occipital CSF | 0.09            | .22      | -0.06            | .43      | -0.02               | .77      |

CSF, cerebrospinal fluid; GM, gray matter; WM, white matter.
